# Supplementary figures and images for: Adjuvant Therapy for Revision Rhinoplasty of Contracted Nose Using Polydeoxyribonucleotide and Invasive Bipolar Radiofrequency
Source: PubMed Central journal article supplement — Plast Reconstr Surg Glob Open. 2018 Jan 16;6(1):e1645. doi: 10.1097/GOX.0000000000001645 (PMC5811300; doi:10.1097/gox.0000000000001645), 2018-01-16

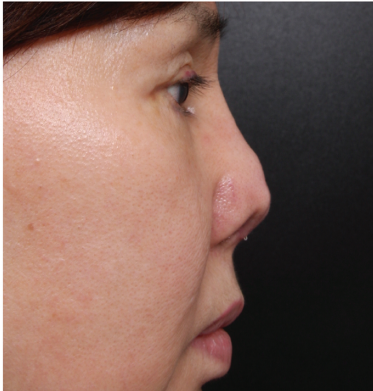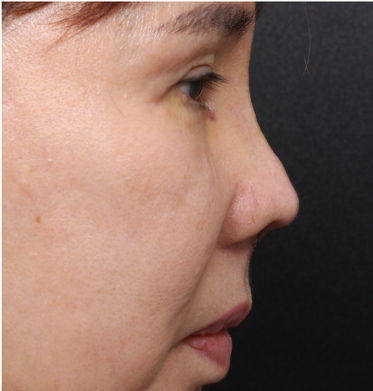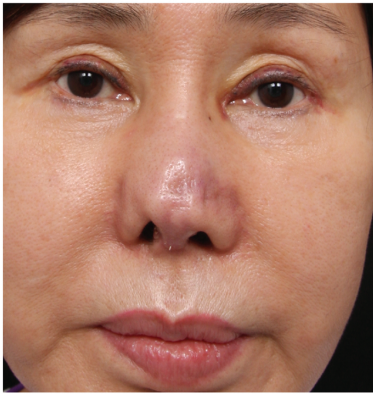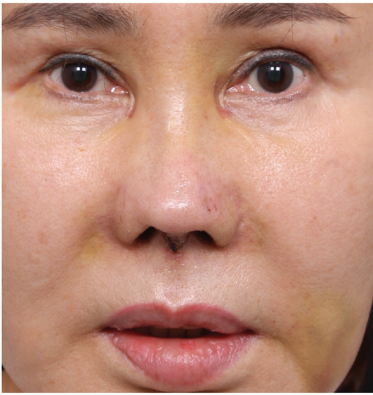

Supplement: gox-6-e1645-s001.pdf [file gox-6-e1645-s001.pdf]

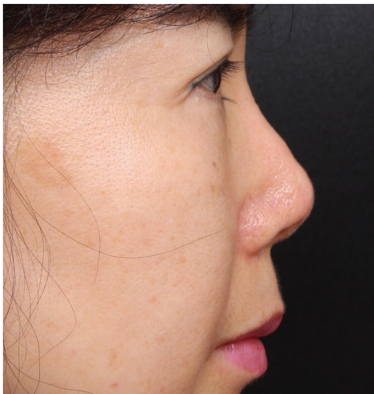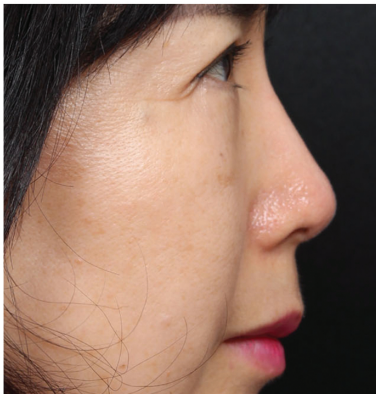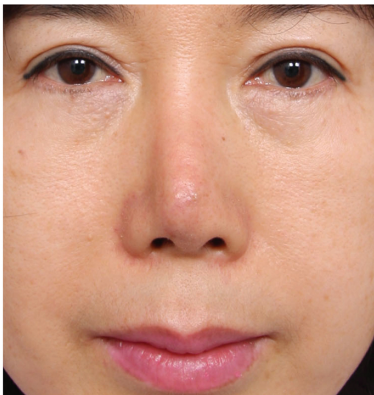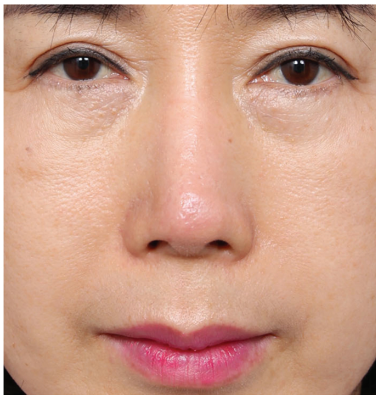

Supplement: gox-6-e1645-s002.pdf [file gox-6-e1645-s002.pdf]

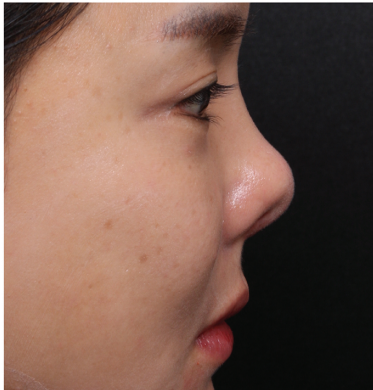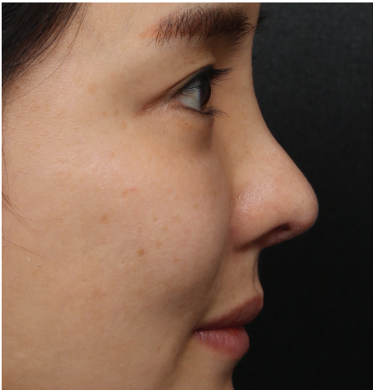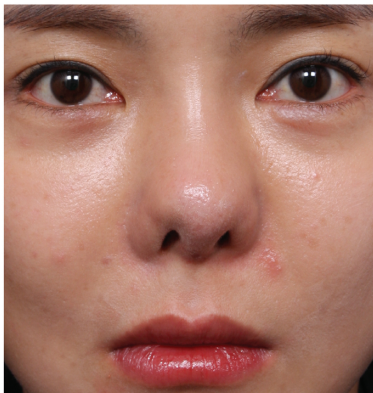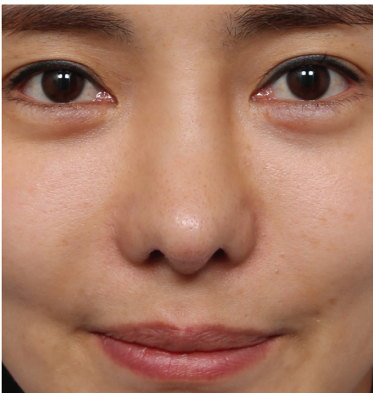

Supplement: gox-6-e1645-s003.pdf [file gox-6-e1645-s003.pdf]

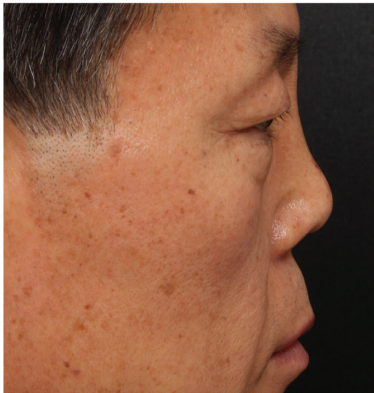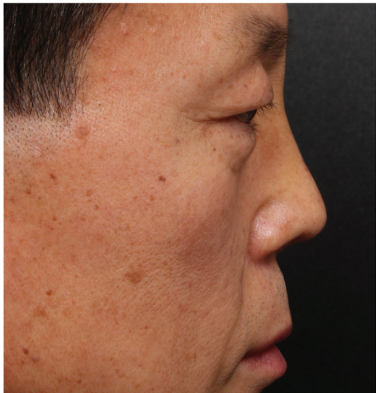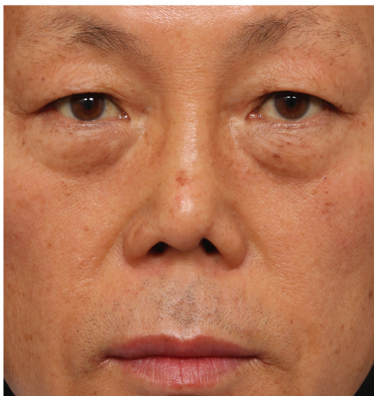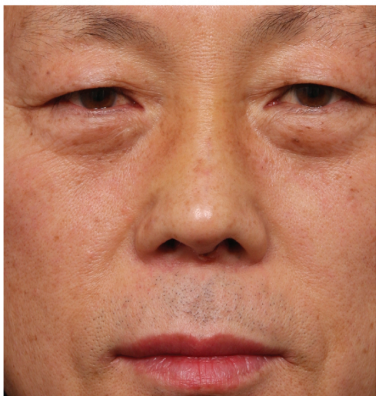

Supplement: gox-6-e1645-s004.pdf [file gox-6-e1645-s004.pdf]

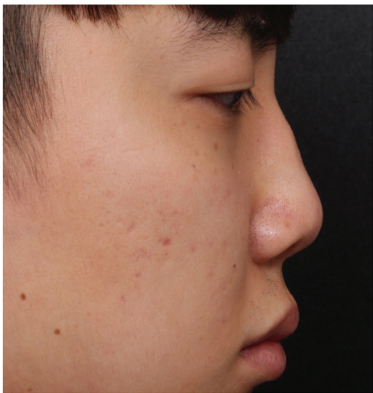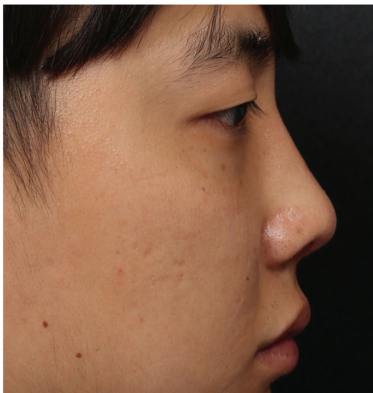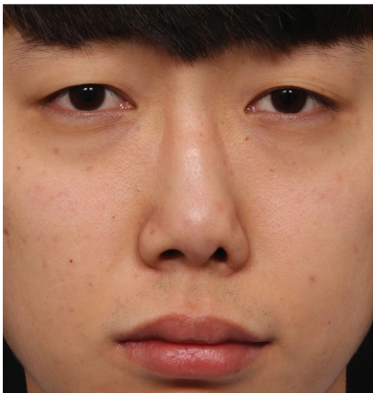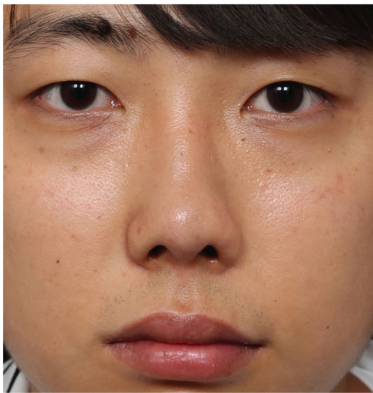

Supplement: gox-6-e1645-s005.pdf [file gox-6-e1645-s005.pdf]
